# Supplementary material for: Maintenance costs of serotiny in a variably serotinous pine: The role of water supply
Source: PubMed Central journal article supplement (PMC5521817; doi:10.1371/journal.pone.0181648), 2017-07-21
Supplement: pone.0181648.s001.pdf [file pone.0181648.s001.pdf]

1 **S1 Appendix**

2 Table A. Cycle of controlled temperature and relative humidity used in the screening laboratory  
3 experiment with individual cones.

| <b>Time (min)</b> | <b>Temperature (°C)</b> | <b>Relative humidity (%)</b> |
|-------------------|-------------------------|------------------------------|
| 5                 | 36                      | 25                           |
| 60                | 36                      | 25                           |
| 5                 | 36 – 40                 | 25 – 20                      |
| 120               | 40                      | 20                           |
| 5                 | 40 – 44                 | 20 – 15                      |
| 120               | 44                      | 15                           |
| 5                 | 48 – 52                 | 10 – 8                       |
| 300               | 48                      | 10                           |
| 5                 | 48 – 52                 | 10 – 8                       |
| 240               | 52                      | 8                            |
| 5                 | 52 – 56                 | 6 – 4                        |
| 300               | 56                      | 6                            |
| 5                 | 56 – 60                 | 6 – 4                        |
| 240               | 60                      | 4                            |

4  
5  
6  
7  
8  
9  
10  
11  
12  
13  
14  
15  
16  
17  
18

19 Table B. Cycle of controlled temperature and relative humidity used in the manipulating water  
20 availability ex situ experiment with pairs of cones from the same whorl.

| <b>Time (min)</b> | <b>Temperature (°C)</b> | <b>Relative humidity (%)</b> |
|-------------------|-------------------------|------------------------------|
| 15                | 0 – 24                  | 40                           |
| 120               | 24                      | 40                           |
| 5                 | 24 – 28                 | 40 – 35                      |
| 120               | 28                      | 35                           |
| 5                 | 28 – 32                 | 35 – 30                      |
| 240               | 32                      | 30                           |
| 5                 | 32 – 36                 | 30 – 25                      |
| 240               | 36                      | 25                           |
| 5                 | 36 – 40                 | 25 – 20                      |
| 360               | 40                      | 20                           |
| 5                 | 40 – 44                 | 20 – 15                      |
| 360               | 44                      | 15                           |
| 5                 | 44 – 48                 | 15 – 10                      |
| 360               | 48                      | 10                           |
| 5                 | 48 – 52                 | 10 – 8                       |
| 360               | 52                      | 8                            |
| 5                 | 52 – 56                 | 8 – 6                        |
| 240               | 56                      | 6                            |
| 5                 | 56 – 60                 | 6 – 4                        |
| 240               | 60                      | 4                            |

21

22

23

24

25

26

27

28

29

30

31

32

33 Table C. Results of linear and generalized linear mixed models for the different experiments.  
 34 Models were fitted excluding the relevant terms. Akaike's Information Criterion (AIC), and model  
 35 degrees of freedom (DF) are given for each model. Chi-square statistic (Chisq), degrees of  
 36 freedom (df) and *P*-value are given for likelihood ratio tests between the model with and without  
 37 the correspondence variable. Variance and standard deviation for the random effects of the  
 38 chosen models are given.

| Model                      | AIC           | DF | Chisq | df | <i>P</i> -value      | Var.      | Std. Dev. |
|----------------------------|---------------|----|-------|----|----------------------|-----------|-----------|
| <b>Eq. 2</b>               |               |    |       |    |                      |           |           |
| Age + Dens + H             | 3021.2        | 6  |       |    |                      |           |           |
| Age                        | <i>3019.2</i> | 4  | 7.85  | 1  | <b>0.005**</b>       |           |           |
| Dens                       | 3028.2        | 4  | 1.00  | 1  | 0.317 n.s.           |           |           |
| H                          | 3025.9        | 4  | 1.07  | 1  | 0.301 n.s.           |           |           |
| Random effects: Test cycle |               |    |       |    |                      | 1.042e+07 | 3.228e+03 |
| Residual                   |               |    |       |    |                      | 1.684e+08 | 1.298e+04 |
| <b>Eq. 3</b>               |               |    |       |    |                      |           |           |
| Treat + Accum.T            | <i>60.5</i>   | 4  |       |    |                      |           |           |
| Treat * Accum.T            | 62.5          | 5  | 0.03  | 1  | 0.860 n.s.           |           |           |
| Treat                      | 63.2          | 3  | 17.74 | 1  | <b>&lt;0.0001***</b> |           |           |
| Accum.T                    | 76.2          | 3  | 4.71  | 1  | <b>0.023*</b>        |           |           |
| Random effects: Pair:Cone  |               |    |       |    |                      | 0.291     | 0.540     |
| <b>Eq. 4</b>               |               |    |       |    |                      |           |           |
| Null                       | 243.9         | 4  |       |    |                      |           |           |
| Treat                      | <i>212.8</i>  | 5  | 33.13 | 1  | <b>&lt;0.0001***</b> |           |           |
| Random effects: Pair       |               |    |       |    |                      | 1.287     | 1.135     |
| Test cycle                 |               |    |       |    |                      | 1.355     | 1.164     |
| Residual                   |               |    |       |    |                      | 1.382     | 1.176     |
| <b>Eq. 5</b>               |               |    |       |    |                      |           |           |
| Treat + Group + Site       | <i>245.6</i>  | 5  |       |    |                      |           |           |
| Treat * Group * Site       | 248.3         | 9  | 1.98  | 1  | 0.159                |           |           |
| Treat * Group              | 249.9         | 5  | 0.22  | 1  | 0.637                |           |           |
| Treat * Site               | 252.0         | 5  | 0.00  | 1  | 0.994                |           |           |
| Group * Site               | 292.8         | 5  | 3.24  | 1  | 0.072                |           |           |
| Treat                      | 252.2         | 3  | 49.09 | 1  | <b>&lt;0.0001***</b> |           |           |
| Group                      | 295.9         | 3  | 6.37  | 1  | <b>0.012*</b>        |           |           |
| Site                       | 297.7         | 3  | 4.34  | 1  | <b>0.037*</b>        |           |           |
| Random effects: Tree       |               |    |       |    |                      | 0.479     | 0.692     |

39 Accum.T = Accumulated temperature; Treat = Treatment; Group = Group of provenances.

40 AIC and DF of the chosen model for each experiment are in italics.

41 Significant *P*-values for the fixed effects are in bold case.

42

43

44

45

46

47

48

49 Table D. Summary of the selection process of generalized linear models and results of the  
 50 chosen GLM for the field manipulative experiment carried out at OLM site. Akaike's  
 51 Information Criterion (AIC) and degrees of freedom (DF) are given for each model. Degrees  
 52 of freedom of each parameter (df), deviance (Dev.), residual degrees of freedom (Res.df),  
 53 residual deviance (Res. Dev.) and *P*-value of the ANOVA table are given for each explanatory  
 54 variable of the chosen model.

| <b>Model</b>            | <b>AIC</b>   | <b>DF</b> | df | Dev.  | Res. df | Res. Dev. | <i>P</i> -value      |
|-------------------------|--------------|-----------|----|-------|---------|-----------|----------------------|
| <b>Eq. 6</b>            |              |           |    |       |         |           |                      |
| Treat * Prov + Db + Ser | 168.4        | 28        |    |       |         |           |                      |
| Treat * Prov + Db       | 167.9        | 27        |    |       |         |           |                      |
| Treat * Prov + Ser      | 167.3        | 27        |    |       |         |           |                      |
| Treat * Prov            | 167.9        | 26        | 12 | 23.12 | 146     | 115.89    | <b>0.023*</b>        |
| <i>Treat + Prov</i>     | <i>167.0</i> | <i>14</i> |    |       |         |           |                      |
| Treat                   | 173.6        | 2         | 1  | 32.11 | 170     | 169.64    | <b>&lt;0.0001***</b> |
| Prov                    | 203.2        | 13        | 12 | 30.62 | 158     | 139.01    | <b>0.002**</b>       |
| Null                    | 203.7        | 1         |    |       | 171     | 201.75    |                      |

55 Treat = Treatment; Prov = Provenances.

56 The chosen model is in italics.

57 Significant *P*-values are in bold case.
