# Supplementary material for: Maintenance costs of serotiny in a variably serotinous pine: The role of water supply
Source: PLoS One. 2017 Jul 21;12(7):e0181648. doi: 10.1371/journal.pone.0181648 (PMC5521817; doi:10.1371/journal.pone.0181648)
Supplement: S2 Appendix — Table A. Database with all the variables used in the screening laboratory experiment. Table B. Database with the variables used in the ‘manipulating tree to cone physical connection in situ’ experiment for both sites. Table C. Database with the variables used in the ‘manipulating tree to cone physical connection in situ’ experiment only for OLM site. Table D. Database with all the variables used in the ‘manipulating water availability ex situ’ experiment. (EXCEL file). (XLSX) [file pone.0181648.s002.xlsx]

## Sheet: Description Table A
Description of the data used in the screening laboratory experiment
ID	Identification number of each cone
Test	Test cycle
Age	Age of each cone
H	Moisture content of each cone after the experiment
Dens	Scales density
T	Accumulated temperature suffered by each cone until opening

## Sheet: Table A
ID	Test	Age	H	Dens	T
1	1	6	11.9585	0.742068	63120
2	1	8	12.9153	0.701852	41340
3	1	8	12.0515	0.655823	62280
4	1	3	13.2857	0.718168	45932
5	1	3	14.2333	0.704861	42012
6	1	4	12.2552	0.728863	58560
7	1	4	12.6067	0.720501	58380
8	1	6	13.3895	0.634663	30288
9	1	6	14.0482	0.644661	30496
10	1	4	13.6954	0.640027	50748
11	1	4	11.3386	0.657914	67500
12	1	4	13.8893	0.610862	57540
13	1	4	13.2317	0.596402	57900
14	1	4	13.7047	0.69832	43076
15	1	6	13.889	0.692786	28312
16	1	6	13.6828	0.562923	22008
17	1	7	13.3701	0.531959	58500
18	1	7	13.5308	0.6637	57900
19	1	7	12.7389	0.63979	60180
20	1	8	9.94594	0.70465	NA
21	2	6	9.38708	0.662588	NA
22	2	6	9.552	0.662605	NA
23	2	9	12.751	0.64487	58500
24	2	9	10.9613	0.60798	71520
25	2	4	12.7761	0.621255	47780
26	2	7	12.3924	0.678161	42460
27	2	7	12.9224	0.688411	41172
28	2	6	13.465	0.610854	55004
29	2	6	14.2521	0.630476	30288
30	2	6	13.1344	0.592787	51140
31	2	4	9.83894	0.722571	NA
32	2	4	9.76132	0.677528	NA
33	2	5	8.66303	0.675358	NA
34	2	5	8.69407	0.67978	NA
35	2	4	7.00854	0.695011	NA
36	2	4	8.79938	0.716284	NA
37	2	7	14.4192	0.57549	31848
38	2	7	13.6236	0.585262	32992
39	2	7	14.2795	0.590426	29352
40	2	4	10.737	0.719697	67680
41	2	10	9.84781	0.710837	NA
42	2	10	11.2179	0.696467	67860
43	2	4	10.312	0.684128	56404
44	3	6	11.4814	0.711781	62940
45	3	6	9.14825	0.666163	68460
46	3	4	8.42272	0.660364	NA
47	3	4	9.28453	0.664075	NA
48	3	4	9.40943	0.668555	65100
49	3	4	10.498	0.661342	56572
50	3	4	12.6648	0.637841	58560
51	3	4	12.9591	0.633677	58380
52	3	3	10.5162	0.648202	57480
53	3	3	10.2374	0.670698	45260
54	3	3	8.52183	0.642989	NA
55	3	3	10.1522	0.652116	NA
56	3	2	10.3448	0.684211	NA
57	3	2	10.5881	0.652778	70500
58	3	6	11.3105	0.631254	58380
59	3	6	12.0495	0.638126	40332
60	3	4	13.0923	0.595684	40780
61	3	4	13.0931	0.654873	29560
62	3	8	12.166	0.698405	27688
63	3	8	11.8347	0.687932	18072
64	3	5	13.3723	0.649009	52652
65	3	5	7.94872	0.68466	NA
66	3	5	8.12745	0.676239	NA
67	4	4	11.3315	0.698137	53604
68	4	4	11.6951	0.692201	44924
69	4	6	11.4671	0.6507	42516
70	4	6	10.3286	0.653422	59640
71	4	6	7.50024	0.620245	NA
72	4	3	6.58131	0.713038	57600
73	4	3	6.47941	0.683045	58200
74	4	8	7.16524	0.71349	36112
75	4	8	6.95563	0.761165	40500
76	4	5	5.9874	0.746032	29300
77	4	7	6.64711	0.695312	28208
78	4	6	6.55897	0.672776	58020
79	4	4	6.61998	0.692308	40444
80	4	7	6.23504	0.727485	57840
81	4	5	6.25797	0.665605	45484
82	4	4	6.94248	0.560834	29196
83	4	7	6.97237	0.617034	57720
84	4	7	7.18574	0.608466	57720
85	4	4	6.67115	0.750539	28260
86	4	4	5.91662	0.708533	40612
87	4	6	7.3816	0.51015	40668
88	4	5	6.5715	0.58979	57780
89	4	7	7.20494	0.599741	58080
90	5	6	7.72077	0.598234	41172
91	5	8	7.47931	0.643437	31848
92	5	8	8.15113	0.655512	40892
93	5	9	7.68195	0.648701	28156
94	5	9	7.80685	0.638736	41284
95	5	6	7.79471	0.71091	28156
96	5	6	8.07807	0.659871	28104
97	5	7	7.43694	0.626415	28052
98	5	7	7.26822	0.702188	26424
99	5	5	7.73923	0.642857	41228
100	5	6	7.72201	0.689655	41228
101	5	7	6.92861	0.662152	40668
102	5	7	7.81261	0.636494	45652
103	5	7	7.81219	0.68811	37360
104	5	4	7.53251	0.620963	40724
105	5	8	7.36567	0.624274	58020
106	5	8	6.97487	0.673973	40780
107	5	8	5.30906	0.685272	NA
108	5	8	5.61214	0.653501	NA
109	5	8	7.23831	0.669694	62340
110	5	8	7.23552	0.703451	61080
111	5	7	6.77382	0.653188	29664
112	5	7	7.29107	0.638193	30704
113	5	7	7.00555	0.655508	28260
114	6	8	6.66004	0.715089	30444
115	6	8	7.43232	0.678082	57720
116	6	9	7.31044	0.73135	15576
117	6	9	6.9062	0.693216	40780
118	6	5	6.98384	0.721627	28416
119	6	5	5.89818	0.693353	58680
120	6	5	5.7971	0.654407	61140
121	6	6	6.37468	0.719911	40612
122	6	8	6.07198	0.631148	NA
123	6	8	8.14876	0.718656	56460
124	6	8	7.76643	0.733258	39752
125	6	9	5.77331	0.642754	NA
126	6	8	7.65959	0.674854	40612
127	6	8	7.31751	0.666667	43860
128	6	10	7.70298	0.674242	16392
129	6	11	7.90813	0.68748	22632
130	6	9	7.25759	0.562698	58320
131	6	9	7.87593	0.547468	42572
132	6	8	6.23675	0.676398	40892
133	6	8	7.14957	0.610998	28728
134	6	7	6.56164	0.676762	NA
135	6	8	7.08101	0.636552	40724
136	6	13	7.08969	0.714224	27844
137	6	7	7.91484	0.657483	41228
138	7	9	9.08993	0.735433	29404
139	7	3	9.0029	0.76501	58380
140	7	6	9.52606	0.740268	17304
141	7	7	9.98137	0.671135	16392
142	7	5	9.11654	0.691983	18264
143	7	6	9.52008	0.684008	41284
144	7	6	9.9093	0.682192	22008
145	7	7	9.05956	0.686239	29404
146	7	7	8.95269	0.646776	41004
147	7	7	9.04769	0.637871	29924
148	7	4	9.6726	0.673973	40612
149	7	9	10.0512	0.645914	28468
150	7	6	10.1717	0.714154	28884
151	7	6	10.1656	0.774715	44476
152	7	9	10.195	0.661114	46604
153	7	12	9.56115	0.743757	16200
154	7	5	7.34763	0.787761	60480
155	7	8	9.40692	0.727909	21000
156	7	8	9.62215	0.663305	21672
157	7	7	8.45974	0.53782	43636
158	7	10	10.2767	0.680203	41620
159	7	7	9.18129	0.657241	46436
160	7	5	9.17401	0.662728	58800
161	7	5	9.63423	0.643312	41452

## Sheet: Description Table B
Description of the data used in the 'manipulating tree to cone physical connection in situ' experiment with both sites (ALT and OLM)
ID	Identification number of each cone
Site	Trial site
Prov	Provenance identification
Group	Group of provenances
Ind	Identification number of each individual
Pair	Identification number of each pair of cones
Trat	Treatment: 1 = detached cone; 0 = branched cone -control-
Opening	Opening status at the end of the experiment: 1 = cone opened; 0 = cone did not open

## Sheet: Table B
ID	Site	Prov	Group	Ind	Pair	Trat	Opening
1	ALT	61	Southwest	1	1	1	0
2	ALT	61	Southwest	1	1	0	0
3	ALT	61	Southwest	1	2	1	1
4	ALT	61	Southwest	1	2	0	0
5	ALT	61	Southwest	2	3	1	0
6	ALT	61	Southwest	2	3	0	0
7	ALT	61	Southwest	2	4	1	0
8	ALT	61	Southwest	2	4	0	0
9	ALT	141	Northeast	3	5	1	0
10	ALT	141	Northeast	3	5	0	0
11	ALT	141	Northeast	3	6	1	0
12	ALT	141	Northeast	3	6	0	0
13	ALT	141	Northeast	3	7	1	0
14	ALT	141	Northeast	3	7	0	0
15	ALT	143	Northeast	4	8	1	1
16	ALT	143	Northeast	4	8	0	0
17	ALT	143	Northeast	4	9	1	1
18	ALT	143	Northeast	4	9	0	0
19	ALT	143	Northeast	4	10	1	1
20	ALT	143	Northeast	4	10	0	0
21	ALT	144	Northeast	5	11	1	0
22	ALT	144	Northeast	5	11	0	0
23	ALT	144	Northeast	5	12	1	0
24	ALT	144	Northeast	5	12	0	0
25	ALT	151	Northeast	6	13	1	0
26	ALT	151	Northeast	6	13	0	0
27	ALT	151	Northeast	6	14	1	0
28	ALT	151	Northeast	6	14	0	0
29	ALT	156	Northeast	7	15	1	0
30	ALT	156	Northeast	7	15	0	0
31	ALT	156	Northeast	7	16	1	1
32	ALT	156	Northeast	7	16	0	0
33	ALT	156	Northeast	7	17	1	0
34	ALT	156	Northeast	7	17	0	0
35	ALT	232	Southwest	8	18	1	0
36	ALT	232	Southwest	8	18	0	0
37	ALT	232	Southwest	8	19	1	0
38	ALT	232	Southwest	8	19	0	0
39	ALT	241	Southwest	9	20	1	0
40	ALT	241	Southwest	9	20	0	0
41	ALT	241	Southwest	9	21	1	0
42	ALT	241	Southwest	9	21	0	0
43	ALT	241	Southwest	9	22	1	0
44	ALT	241	Southwest	9	22	0	0
45	ALT	241	Southwest	10	23	1	0
46	ALT	241	Southwest	10	23	0	0
47	ALT	241	Southwest	10	24	1	0
48	ALT	241	Southwest	10	24	0	0
49	ALT	241	Southwest	11	25	1	0
50	ALT	241	Southwest	11	25	0	0
51	ALT	241	Southwest	11	26	1	1
52	ALT	241	Southwest	11	26	0	0
53	ALT	241	Southwest	11	27	1	0
54	ALT	241	Southwest	11	27	0	0
55	ALT	156	Northeast	12	28	1	1
56	ALT	156	Northeast	12	28	0	0
57	ALT	156	Northeast	12	28	0	0
58	ALT	156	Northeast	12	29	1	1
59	ALT	156	Northeast	12	29	0	0
60	ALT	156	Northeast	12	30	1	0
61	ALT	156	Northeast	12	30	0	0
62	ALT	158	Northeast	13	31	1	0
63	ALT	158	Northeast	13	31	0	0
64	ALT	158	Northeast	13	32	1	0
65	ALT	158	Northeast	13	32	0	0
66	ALT	231	Southwest	14	33	1	0
67	ALT	231	Southwest	14	33	0	0
68	ALT	231	Southwest	14	34	1	0
69	ALT	231	Southwest	14	34	0	0
70	ALT	231	Southwest	14	35	1	0
71	ALT	231	Southwest	14	35	0	0
72	ALT	231	Southwest	15	36	1	0
73	ALT	231	Southwest	15	36	0	0
74	ALT	231	Southwest	15	36	0	0
75	ALT	231	Southwest	15	37	1	0
76	ALT	231	Southwest	15	37	0	0
77	ALT	231	Southwest	16	38	1	1
78	ALT	231	Southwest	16	38	0	1
79	ALT	231	Southwest	16	39	1	0
80	ALT	231	Southwest	16	39	0	0
81	ALT	231	Southwest	16	40	1	0
82	ALT	231	Southwest	16	40	0	0
83	ALT	242	Southwest	17	41	1	1
84	ALT	242	Southwest	17	41	0	0
85	ALT	242	Southwest	17	42	1	1
86	ALT	242	Southwest	17	42	0	0
87	ALT	242	Southwest	18	43	1	0
88	ALT	242	Southwest	18	43	0	0
89	ALT	242	Southwest	18	44	1	0
90	ALT	242	Southwest	18	44	0	0
91	ALT	242	Southwest	18	45	1	1
92	ALT	242	Southwest	18	45	0	0
93	ALT	61	Southwest	19	46	1	0
94	ALT	61	Southwest	19	46	0	0
95	ALT	61	Southwest	19	46	0	0
96	ALT	61	Southwest	19	46	0	0
97	ALT	61	Southwest	19	47	1	0
98	ALT	61	Southwest	19	47	0	0
99	ALT	61	Southwest	19	47	0	0
100	ALT	61	Southwest	19	47	0	0
101	ALT	61	Southwest	19	48	1	0
102	ALT	61	Southwest	19	48	0	0
103	ALT	61	Southwest	19	48	0	0
104	ALT	61	Southwest	19	48	0	0
105	ALT	232	Southwest	20	49	1	1
106	ALT	232	Southwest	20	49	0	1
107	ALT	242	Southwest	21	50	1	0
108	ALT	242	Southwest	21	50	0	0
109	ALT	242	Southwest	21	51	1	1
110	ALT	242	Southwest	21	51	0	0
111	OLM	103	Northeast	22	52	1	1
112	OLM	103	Northeast	22	52	0	0
113	OLM	103	Northeast	22	53	1	1
114	OLM	103	Northeast	22	53	0	0
115	OLM	103	Northeast	22	54	1	1
116	OLM	103	Northeast	22	54	0	0
117	OLM	152	Northeast	23	55	1	1
118	OLM	152	Northeast	23	55	0	0
119	OLM	152	Northeast	23	56	1	1
120	OLM	152	Northeast	23	56	0	0
121	OLM	152	Northeast	23	57	1	0
122	OLM	152	Northeast	23	57	0	0
123	OLM	158	Northeast	24	58	1	1
124	OLM	158	Northeast	24	58	0	0
125	OLM	158	Northeast	24	59	1	1
126	OLM	158	Northeast	24	59	0	0
127	OLM	158	Northeast	24	59	0	0
128	OLM	158	Northeast	24	60	1	1
129	OLM	158	Northeast	24	60	0	0
130	OLM	172	Southwest	25	61	1	1
131	OLM	172	Southwest	25	61	0	0
132	OLM	172	Southwest	25	62	1	0
133	OLM	172	Southwest	25	62	0	0
134	OLM	172	Southwest	25	63	1	0
135	OLM	172	Southwest	25	63	0	0
136	OLM	103	Northeast	26	64	1	1
137	OLM	103	Northeast	26	64	0	0
138	OLM	103	Northeast	26	65	1	0
139	OLM	103	Northeast	26	65	0	0
140	OLM	103	Northeast	26	66	1	0
141	OLM	103	Northeast	26	66	0	0
142	OLM	151	Northeast	27	67	1	1
143	OLM	151	Northeast	27	67	0	0
144	OLM	151	Northeast	27	68	1	0
145	OLM	151	Northeast	27	68	0	1
146	OLM	151	Northeast	27	69	1	0
147	OLM	151	Northeast	27	69	0	0
148	OLM	152	Northeast	28	70	1	1
149	OLM	152	Northeast	28	70	0	0
150	OLM	152	Northeast	28	71	1	1
151	OLM	152	Northeast	28	71	0	0
152	OLM	152	Northeast	28	71	0	0
153	OLM	152	Northeast	28	72	1	1
154	OLM	152	Northeast	28	72	0	1
155	OLM	158	Northeast	29	73	1	1
156	OLM	158	Northeast	29	73	0	0
157	OLM	158	Northeast	29	74	1	1
158	OLM	158	Northeast	29	74	0	0
159	OLM	158	Northeast	29	75	1	1
160	OLM	158	Northeast	29	75	0	0
161	OLM	231	Southwest	30	76	1	1
162	OLM	231	Southwest	30	76	0	0
163	OLM	231	Southwest	30	77	1	1
164	OLM	231	Southwest	30	77	0	0
165	OLM	231	Southwest	30	78	1	1
166	OLM	231	Southwest	30	78	0	0
167	OLM	241	Southwest	31	79	1	0
168	OLM	241	Southwest	31	79	0	0
169	OLM	241	Southwest	31	80	1	0
170	OLM	241	Southwest	31	80	0	0
171	OLM	241	Southwest	31	81	1	0
172	OLM	241	Southwest	31	81	0	0
173	OLM	242	Southwest	32	82	1	0
174	OLM	242	Southwest	32	82	0	0
175	OLM	242	Southwest	32	83	1	0
176	OLM	242	Southwest	32	83	0	0
177	OLM	242	Southwest	32	84	1	0
178	OLM	242	Southwest	32	84	0	0
179	OLM	61	Southwest	33	85	1	0
180	OLM	61	Southwest	33	85	0	0
181	OLM	61	Southwest	33	86	1	0
182	OLM	61	Southwest	33	86	0	0
183	OLM	61	Southwest	33	87	1	0
184	OLM	61	Southwest	33	87	0	0
185	OLM	61	Southwest	34	88	1	1
186	OLM	61	Southwest	34	88	0	0
187	OLM	61	Southwest	34	89	1	0
188	OLM	61	Southwest	34	89	0	0
189	OLM	61	Southwest	34	90	1	1
190	OLM	61	Southwest	34	90	0	0
191	OLM	152	Northeast	35	91	1	0
192	OLM	152	Northeast	35	91	0	0
193	OLM	152	Northeast	35	91	0	0
194	OLM	152	Northeast	35	92	1	0
195	OLM	152	Northeast	35	92	0	1
196	OLM	152	Northeast	35	93	1	1
197	OLM	152	Northeast	35	93	0	0
198	OLM	156	Northeast	36	94	1	0
199	OLM	156	Northeast	36	94	0	0
200	OLM	156	Northeast	36	95	1	0
201	OLM	156	Northeast	36	95	0	0
202	OLM	156	Northeast	36	96	1	1
203	OLM	156	Northeast	36	96	0	1
204	OLM	172	Southwest	37	97	1	0
205	OLM	172	Southwest	37	97	0	0
206	OLM	172	Southwest	37	98	1	0
207	OLM	172	Southwest	37	98	0	0
208	OLM	172	Southwest	37	99	1	0
209	OLM	172	Southwest	37	99	0	0
210	OLM	232	Southwest	38	100	1	1
211	OLM	232	Southwest	38	100	0	0
212	OLM	232	Southwest	38	101	1	0
213	OLM	232	Southwest	38	101	0	1
214	OLM	233	Southwest	39	102	1	1
215	OLM	233	Southwest	39	102	0	0
216	OLM	233	Southwest	39	103	1	1
217	OLM	233	Southwest	39	103	0	0
218	OLM	233	Southwest	39	104	1	1
219	OLM	233	Southwest	39	104	0	0
220	OLM	241	Southwest	40	105	1	0
221	OLM	241	Southwest	40	105	0	0
222	OLM	241	Southwest	40	106	1	0
223	OLM	241	Southwest	40	106	0	0
224	OLM	242	Southwest	41	107	1	1
225	OLM	242	Southwest	41	107	0	0
226	OLM	242	Southwest	41	108	1	1
227	OLM	242	Southwest	41	108	0	0
228	OLM	242	Southwest	41	109	1	0
229	OLM	242	Southwest	41	109	0	0
230	OLM	242	Southwest	42	110	1	0
231	OLM	242	Southwest	42	110	0	1
232	OLM	242	Southwest	42	111	1	1
233	OLM	242	Southwest	42	111	0	0
234	OLM	242	Southwest	42	111	0	0
235	OLM	242	Southwest	42	112	1	0
236	OLM	242	Southwest	42	112	0	0
237	OLM	242	Southwest	43	113	1	1
238	OLM	242	Southwest	43	113	0	0
239	OLM	242	Southwest	43	114	1	0
240	OLM	242	Southwest	43	114	0	0
241	OLM	242	Southwest	43	115	1	0
242	OLM	242	Southwest	43	115	0	0
243	OLM	242	Southwest	44	116	1	0
244	OLM	242	Southwest	44	116	0	0
245	OLM	242	Southwest	44	117	1	0
246	OLM	242	Southwest	44	117	0	0
247	OLM	242	Southwest	44	118	1	0
248	OLM	242	Southwest	44	118	0	0
249	OLM	104	Northeast	45	119	1	0
250	OLM	104	Northeast	45	119	0	1
251	OLM	104	Northeast	45	120	1	0
252	OLM	104	Northeast	45	120	0	1
253	OLM	104	Northeast	45	121	1	1
254	OLM	104	Northeast	45	121	0	0
255	OLM	151	Northeast	46	122	1	1
256	OLM	151	Northeast	46	122	0	0
257	OLM	151	Northeast	46	123	1	1
258	OLM	151	Northeast	46	123	0	0
259	OLM	151	Northeast	46	124	1	1
260	OLM	151	Northeast	46	124	0	0
261	OLM	232	Southwest	47	125	1	0
262	OLM	232	Southwest	47	125	0	0
263	OLM	232	Southwest	47	126	1	0
264	OLM	232	Southwest	47	126	0	0
265	OLM	232	Southwest	47	127	1	1
266	OLM	232	Southwest	47	127	0	0
267	OLM	241	Southwest	48	128	1	0
268	OLM	241	Southwest	48	128	0	0
269	OLM	241	Southwest	48	129	1	0
270	OLM	241	Southwest	48	129	0	0
271	OLM	242	Southwest	49	130	1	1
272	OLM	242	Southwest	49	130	0	0
273	OLM	242	Southwest	49	131	1	1
274	OLM	242	Southwest	49	131	0	0
275	OLM	242	Southwest	49	132	1	0
276	OLM	242	Southwest	49	132	0	0
277	OLM	242	Southwest	50	133	1	0
278	OLM	242	Southwest	50	133	0	0
279	OLM	242	Southwest	50	134	1	0
280	OLM	242	Southwest	50	134	0	0
281	OLM	242	Southwest	50	135	1	0
282	OLM	242	Southwest	50	135	0	0

## Sheet: Description Table C
Description of the data used in the 'manipulating tree to cone physical connection in situ' experiment for OLM site
ID	Identification number of each cone
Prov	Provenance identification
Ind	Identification number of each individual
Pair	Identification number of each pair of cones
Trat	Treatment: 1 = detached cone; 0 = branched cone -control-
Opening_10	Opening status 10 weeks after the establishment of the experiment: 1 = cone opened; 0 = cone did not open
Opening_15	Opening status 15 weeks after the establishment of the experiment: 1 = cone opened; 0 = cone did not open
Opening_33	Opening status 33 weeks after the establishment of the experiment: 1 = cone opened; 0 = cone did not open
Opening_54	Opening status 54 weeks after the establishment of the experiment: 1 = cone opened; 0 = cone did not open
Opening_66	Opening status 66 weeks after the establishment of the experiment: 1 = cone opened; 0 = cone did not open
Opening_109	Opening status 109 weeks after the establishment of the experiment: 1 = cone opened; 0 = cone did not open
Opening_125	Opening status at the end of the experiment (125 weeks after its establishment): 1 = cone opened; 0 = cone did not open
Db	Basal diameter
Ser	Total number of serotinous cones

## Sheet: Table C
ID	Prov	Ind	Pair	Trat	Opening_10	Opening_15	Opening_33	Opening_54	Opening_66	Opening_109	Opening_125	Db	Ser
1	103	1	1	1	1	1	1	1	1	1	1	170	10
2	103	1	1	0	0	0	0	0	0	0	0	170	10
3	103	1	2	1	1	1	1	1	1	1	1	170	10
4	103	1	2	0	0	0	0	0	0	0	0	170	10
5	103	1	3	1	0	0	0	1	1	1	1	170	10
6	103	1	3	0	0	0	0	0	0	0	0	170	10
7	152	2	4	1	0	1	1	1	1	1	1	202	49
8	152	2	4	0	0	0	0	0	0	0	0	202	49
9	152	2	5	1	0	1	1	1	1	1	1	202	49
10	152	2	5	0	0	0	0	0	0	0	0	202	49
11	152	2	6	1	0	0	0	0	0	0	0	202	49
12	152	2	6	0	0	0	0	0	0	0	0	202	49
13	158	3	7	1	1	1	1	1	1	1	1	203	21
14	158	3	7	0	0	0	0	0	0	0	0	203	21
15	158	3	8	1	0	1	1	1	1	1	1	203	21
16	158	3	8	0	0	0	0	0	0	0	0	203	21
17	158	3	8	0	0	0	0	0	0	0	0	203	21
18	158	3	9	1	0	1	1	1	1	1	1	203	21
19	158	3	9	0	0	0	0	0	0	0	0	203	21
20	172	4	10	1	0	1	1	1	1	1	1	202	27
21	172	4	10	0	0	0	0	0	0	0	0	202	27
22	172	4	11	1	0	0	0	0	0	0	0	202	27
23	172	4	11	0	0	0	0	0	0	0	0	202	27
24	172	4	12	1	0	0	0	0	0	0	0	202	27
25	172	4	12	0	0	0	0	0	0	0	0	202	27
26	103	5	13	1	0	0	0	1	1	1	1	116	115
27	103	5	13	0	0	0	0	0	0	0	0	116	115
28	103	5	14	1	0	0	0	0	0	0	0	116	115
29	103	5	14	0	0	0	0	0	0	0	0	116	115
30	103	5	15	1	0	0	0	0	0	0	0	116	115
31	103	5	15	0	0	0	0	0	0	0	0	116	115
32	151	6	16	1	0	0	0	0	0	1	1	113	20
33	151	6	16	0	0	0	0	0	0	0	0	113	20
34	151	6	17	1	0	0	0	0	0	0	0	113	20
35	151	6	17	0	0	0	0	0	1	1	1	113	20
36	151	6	18	1	0	0	0	0	0	0	0	113	20
37	151	6	18	0	0	0	0	0	0	0	0	113	20
38	152	7	19	1	0	0	0	1	1	1	1	214	22
39	152	7	19	0	0	0	0	0	0	0	0	214	22
40	152	7	20	1	1	1	1	1	1	1	1	214	22
41	152	7	20	0	0	0	0	0	0	0	0	214	22
42	152	7	20	0	0	0	0	0	0	0	0	214	22
43	152	7	21	1	0	0	0	1	1	1	1	214	22
44	152	7	21	0	0	0	0	1	1	1	1	214	22
45	158	8	22	1	1	1	1	1	1	1	1	194	45
46	158	8	22	0	0	0	0	0	0	0	0	194	45
47	158	8	23	1	0	0	0	0	1	1	1	194	45
48	158	8	23	0	0	0	0	0	0	0	0	194	45
49	158	8	24	1	0	0	0	0	0	0	1	194	45
50	158	8	24	0	0	0	0	0	0	0	0	194	45
51	231	9	25	1	1	1	1	1	1	1	1	150	27
52	231	9	25	0	0	0	0	0	0	0	0	150	27
53	231	9	26	1	0	0	0	0	1	1	1	150	27
54	231	9	26	0	0	0	0	0	0	0	0	150	27
55	231	9	27	1	0	0	0	1	1	1	1	150	27
56	231	9	27	0	0	0	0	0	0	0	0	150	27
57	241	10	28	1	0	0	0	0	0	0	0	157	47
58	241	10	28	0	0	0	0	0	0	0	0	157	47
59	241	10	29	1	0	0	0	0	0	0	0	157	47
60	241	10	29	0	0	0	0	0	0	0	0	157	47
61	241	10	30	1	0	0	0	0	0	0	0	157	47
62	241	10	30	0	0	0	0	0	0	0	0	157	47
63	242	11	31	1	0	0	0	0	0	0	0	164	24
64	242	11	31	0	0	0	0	0	0	0	0	164	24
65	242	11	32	1	0	0	0	0	0	0	0	164	24
66	242	11	32	0	0	0	0	0	0	0	0	164	24
67	242	11	33	1	0	0	0	0	0	0	0	164	24
68	242	11	33	0	0	0	0	0	0	0	0	164	24
69	61	12	34	1	0	0	0	0	0	0	0	173	21
70	61	12	34	0	0	0	0	0	0	0	0	173	21
71	61	12	35	1	0	0	0	0	0	0	0	173	21
72	61	12	35	0	0	0	0	0	0	0	0	173	21
73	61	12	36	1	0	0	0	0	0	0	0	173	21
74	61	12	36	0	0	0	0	0	0	0	0	173	21
75	61	13	37	1	0	0	0	1	1	1	1	177	15
76	61	13	37	0	0	0	0	0	0	0	0	177	15
77	61	13	38	1	0	0	0	0	0	0	0	177	15
78	61	13	38	0	0	0	0	0	0	0	0	177	15
79	61	13	39	1	0	0	0	0	0	0	1	177	15
80	61	13	39	0	0	0	0	0	0	0	0	177	15
81	152	14	40	1	0	0	0	0	0	0	0	210	10
82	152	14	40	0	0	0	0	0	0	0	0	210	10
83	152	14	40	0	0	0	0	0	0	0	0	210	10
84	152	14	41	1	0	0	0	0	0	0	0	210	10
85	152	14	41	0	0	0	0	0	0	1	1	210	10
86	152	14	42	1	0	0	0	0	0	0	1	210	10
87	152	14	42	0	0	0	0	0	0	0	0	210	10
88	156	15	43	1	0	0	0	0	0	0	0	204	23
89	156	15	43	0	0	0	0	0	0	0	0	204	23
90	156	15	44	1	0	0	0	0	0	0	0	204	23
91	156	15	44	0	0	0	0	0	0	0	0	204	23
92	156	15	45	1	0	0	0	0	0	0	1	204	23
93	156	15	45	0	0	0	0	0	0	0	1	204	23
94	172	16	46	1	0	0	0	0	0	0	0	146	10
95	172	16	46	0	0	0	0	0	0	0	0	146	10
96	172	16	47	1	0	0	0	0	0	0	0	146	10
97	172	16	47	0	0	0	0	0	0	0	0	146	10
98	172	16	48	1	0	0	0	0	0	0	0	146	10
99	172	16	48	0	0	0	0	0	0	0	0	146	10
100	232	17	49	1	1	1	1	1	1	1	1	147	24
101	232	17	49	0	0	0	0	0	0	0	0	147	24
102	232	17	50	1	0	0	0	0	0	0	0	147	24
103	232	17	50	0	1	1	1	1	1	1	1	147	24
104	233	18	51	1	0	1	1	1	1	1	1	113	23
105	233	18	51	0	0	0	0	0	0	0	0	113	23
106	233	18	52	1	0	1	1	1	1	1	1	113	23
107	233	18	52	0	0	0	0	0	0	0	0	113	23
108	233	18	53	1	0	0	0	0	0	0	1	113	23
109	233	18	53	0	0	0	0	0	0	0	0	113	23
110	241	19	54	1	0	0	0	0	0	0	0	163	23
111	241	19	54	0	0	0	0	0	0	0	0	163	23
112	241	19	55	1	0	0	0	0	0	0	0	163	23
113	241	19	55	0	0	0	0	0	0	0	0	163	23
114	242	20	56	1	0	0	0	1	1	1	1	197	22
115	242	20	56	0	0	0	0	0	0	0	0	197	22
116	242	20	57	1	0	0	0	0	1	1	1	197	22
117	242	20	57	0	0	0	0	0	0	0	0	197	22
118	242	20	58	1	0	0	0	0	0	0	0	197	22
119	242	20	58	0	0	0	0	0	0	0	0	197	22
120	242	21	59	1	0	0	0	0	0	0	0	125	10
121	242	21	59	0	1	1	1	1	1	1	1	125	10
122	242	21	60	1	0	0	0	1	1	1	1	125	10
123	242	21	60	0	0	0	0	0	0	0	0	125	10
124	242	21	60	0	0	0	0	0	0	0	0	125	10
125	242	21	61	1	0	0	0	0	0	0	0	125	10
126	242	21	61	0	0	0	0	0	0	0	0	125	10
127	242	22	62	1	0	0	0	1	1	1	1	122	45
128	242	22	62	0	0	0	0	0	0	0	0	122	45
129	242	22	63	1	0	0	0	0	0	0	0	122	45
130	242	22	63	0	0	0	0	0	0	0	0	122	45
131	242	22	64	1	0	0	0	0	0	0	0	122	45
132	242	22	64	0	0	0	0	0	0	0	0	122	45
133	242	23	65	1	0	0	0	0	0	0	0	154	19
134	242	23	65	0	0	0	0	0	0	0	0	154	19
135	242	23	66	1	0	0	0	0	0	0	0	154	19
136	242	23	66	0	0	0	0	0	0	0	0	154	19
137	242	23	67	1	0	0	0	0	0	0	0	154	19
138	242	23	67	0	0	0	0	0	0	0	0	154	19
139	104	24	68	1	0	0	0	0	0	0	0	147	21
140	104	24	68	0	0	1	1	1	1	1	1	147	21
141	104	24	69	1	0	0	0	0	0	0	0	147	21
142	104	24	69	0	0	1	1	1	1	1	1	147	21
143	104	24	70	1	0	0	0	0	0	0	1	147	21
144	104	24	70	0	0	0	0	0	0	0	0	147	21
145	151	25	71	1	0	0	0	0	1	1	1	215	12
146	151	25	71	0	0	0	0	0	0	0	0	215	12
147	151	25	72	1	0	0	0	1	1	1	1	215	12
148	151	25	72	0	0	0	0	0	0	0	0	215	12
149	151	25	73	1	0	0	0	0	1	1	1	215	12
150	151	25	73	0	0	0	0	0	0	0	0	215	12
151	232	26	74	1	0	0	0	0	0	0	0	201	24
152	232	26	74	0	0	0	0	0	0	0	0	201	24
153	232	26	75	1	0	0	0	0	0	0	0	201	24
154	232	26	75	0	0	0	0	0	0	0	0	201	24
155	232	26	76	1	0	0	0	0	0	1	1	201	24
156	232	26	76	0	0	0	0	0	0	0	0	201	24
157	241	27	77	1	0	0	0	0	0	0	0	165	23
158	241	27	77	0	0	0	0	0	0	0	0	165	23
159	241	27	78	1	0	0	0	0	0	0	0	165	23
160	241	27	78	0	0	0	0	0	0	0	0	165	23
161	242	28	79	1	1	1	1	1	1	1	1	166	53
162	242	28	79	0	0	0	0	0	0	0	0	166	53
163	242	28	80	1	1	1	1	1	1	1	1	166	53
164	242	28	80	0	0	0	0	0	0	0	0	166	53
165	242	28	81	1	0	0	0	0	0	0	0	166	53
166	242	28	81	0	0	0	0	0	0	0	0	166	53
167	242	29	82	1	0	0	0	0	0	0	0	117	53
168	242	29	82	0	0	0	0	0	0	0	0	117	53
169	242	29	83	1	0	0	0	0	0	0	0	117	53
170	242	29	83	0	0	0	0	0	0	0	0	117	53
171	242	29	84	1	0	0	0	0	0	0	0	117	53
172	242	29	84	0	0	0	0	0	0	0	0	117	53

## Sheet: Description Table D
Description of the data used in the 'manipulating water availability ex situ experiment'
ID	Identification number of each cone
Test	Test cycle
Pair	Identification number of each pair of cones
H	Moisture content of each cone after the experiment
T	Accumulated temperature suffered by each cone until opening
Trat	Treatment: 1 = watered cone; 0 = waterless cone
Opening	Opening status at the end of the experiment: 1 = cone opened before its pair; 0 = cone opened after its pair

## Sheet: Table D
ID	Test	Pair	H	T	Trat	Opening
1	1	1	12.8897	72412	1	1
2	1	1	16.8083	72672	0	0
3	1	2	13.4735	60012	1	0
4	1	2	15.4107	56748	0	1
5	1	3	15.0956	72568	1	0
6	1	3	15.6665	50364	0	1
7	1	4	11.5044	83748	1	0
8	1	4	14.31	77456	0	1
9	1	5	13.2662	91064	1	0
10	1	5	14.2202	78548	0	1
11	1	6	13.3469	91792	1	0
12	1	6	15.0801	91568	0	1
13	1	7	12.398	57276	1	0
14	1	7	16.2162	54492	0	1
15	1	8	13.6849	71892	1	0
16	1	8	18.8766	59964	0	1
17	1	9	12.07	55692	1	0
18	1	9	13.5369	55212	0	1
19	1	10	13.0797	58668	1	0
20	1	10	19.1408	54780	0	1
21	2	11	14.419	73608	1	1
22	2	11	15.3535	91028	0	0
23	2	12	12.0109	73296	1	0
24	2	12	15.1267	72984	0	1
25	2	13	13.5228	57996	1	1
26	2	13	16.7618	60684	0	0
27	2	14	15.0079	64860	1	0
28	2	14	14.5241	64380	0	1
29	2	15	14.3755	54780	1	0
30	2	15	15.7869	54588	0	1
31	2	16	13.6325	45964	1	0
32	2	16	16.5344	43632	0	1
33	2	17	16.1714	71788	1	0
34	2	17	16.7779	55404	0	1
35	2	18	12.7567	72308	1	0
36	2	18	16.6032	45568	0	1
37	2	19	12.4947	55596	1	1
38	2	19	15.4446	57948	0	0
39	4	20	14.9946	72256	1	0
40	4	20	14.9284	72256	0	1
41	4	21	15.3573	63612	1	0
42	4	21	18.9107	56748	0	1
43	4	22	13.2503	72620	1	0
44	4	22	15.8291	72308	0	1
45	4	23	18.6337	68172	1	0
46	4	23	22.5794	67788	0	1
47	4	24	13.0777	72880	1	0
48	4	24	16.5735	72152	0	1
49	4	25	17.1449	47240	1	1
50	4	25	17.8952	71944	0	0
51	4	26	17.2158	54540	1	1
52	4	26	19.1115	72256	0	0
53	4	27	14.4789	56652	1	0
54	4	27	19.5494	55980	0	1
